# Supplementary material for: Areas with High Hazard Potential for Autochthonous Transmission of Aedes albopictus-Associated Arboviruses in Germany
Source: MDPI journal article supplement (doi:10.3390/ijerph15061270), 2018-06-15
Supplement: s1 [file s1]

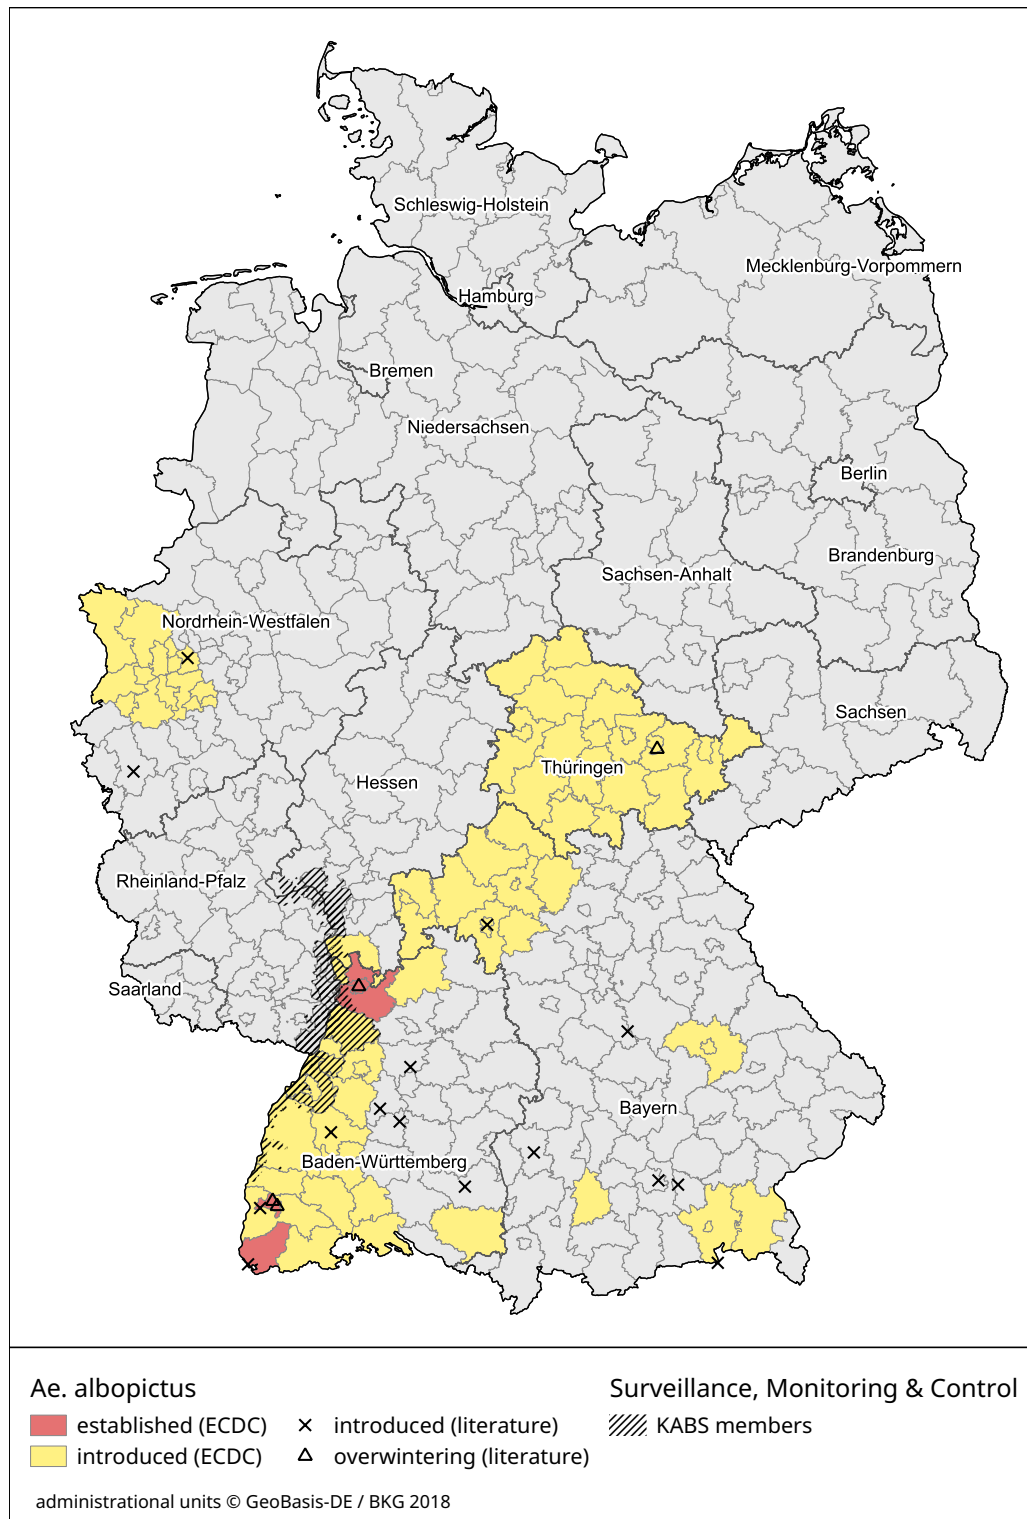

The figure gives an overview about the current situation regarding *Aedes albopictus* in Germany.

The colored areas give the status according to the European Centre for Disease Prevention and Control (ECDC) for German districts (“Landkreis” or “Stadtkreis”, equivalent to NUTS level 3 on a European scale) [1]. Precise locations or data sources are not available for these areas.

Crosses and triangles show point locations that are publically available from the scientific literature (2008–2018) [2-5]. Precision varies from precise site descriptions to rough maps.

Hatched areas show municipalities and districts that are members of the German Mosquito Control Association KABS [6]. The Federal States of Baden-Württemberg and Rheinland-Pfalz support KABS as well. Neither the trapping locations of the currently running CuliMo project nor data from the Mueckenatlas citizen science project [7] are publicly available yet.

## References

1. European Centre for Disease Prevention and Control. Mosquito maps. Available online: <https://ecdc.europa.eu/en/disease-vectors/surveillance-and-disease-data/mosquito-maps> (accessed on 2 May 2018).
2. Kraemer, M.U.G.; Sinka, M.E.; Duda, K.A.; Mylne, A.Q.N.; Shearer, F.M.; Barker, C.M.; Moore, C.G.; Carvalho, R.G.; Coelho, G.E.; Van Bortel, W.; et al. The global distribution of the arbovirus vectors *Aedes aegypti* and *Ae. albopictus*. *Elife* **2015**, *4*, e08347, 10.7554/eLife.08347.
3. Pluskota, B.; Jöst, A.; Augsten, X.; Stelzner, L.; Ferstl, I.; Becker, N. Successful overwintering of *Aedes albopictus* in Germany. *Parasitol Res* **2016**, *115* (8), 3245-3247, 10.1007/s00436-016-5078-2.
4. Walther, D.; Scheuch, D.E.; Kampen, H. The invasive Asian tiger mosquito *Aedes albopictus* (Diptera: Culicidae) in Germany: Local reproduction and overwintering. *Acta Trop* **2017**, *166*, 186-192, 10.1016/j.actatropica.2016.11.024.
5. Kampen, H.; Schuhbauer, A.; Walther, D. Emerging mosquito species in Germany-a synopsis after 6 years of mosquito monitoring (2011-2016). *Parasitol Res* **2017**, *116* (12), 3253-3263, 10.1007/s00436-017-5619-3.
6. Die Mitglieder der KABS e.V. Available online: [http://www.kabsev.de/1/1\\_2/1\\_2\\_4/index.php](http://www.kabsev.de/1/1_2/1_2_4/index.php) (accessed on May 9, 2018).
7. Mückenatlas. Available online: <https://www.mueckenatlas.de/> (accessed on May 9, 2018).
