# Supplementary material for: Areas with High Hazard Potential for Autochthonous Transmission of Aedes albopictus-Associated Arboviruses in Germany
Source: Int J Environ Res Public Health. 2018 Jun 15;15(6):1270. doi: 10.3390/ijerph15061270 (PMC6025521; doi:10.3390/ijerph15061270)
Supplement: Supplementary file 1 [file ijerph-15-01270-s001.zip › Table_S1.xlsx]

## Sheet: Supplement_1
Kreiskennziffer	NUTS	name	incidencerate	climatic suitability	hazard potential	hazard class
1001	DEF01	SK Flensburg	3.43	0.07	0.01	low
1002	DEF02	SK Kiel	6.47	0.07	0.01	low
1003	DEF03	SK Lübeck	5.54	0.07	0.01	low
1004	DEF04	SK Neumünster	5.02	0.07	0.01	low
1051	DEF05	LK Dithmarschen	3.74	0.07	0.01	low
1053	DEF06	LK Herzogtum Lauenburg	7.18	0.07	0.01	low
1054	DEF07	LK Nordfriesland	3.03	0.07	0.01	low
1055	DEF08	LK Ostholstein	4.98	0.07	0.01	low
1056	DEF09	LK Pinneberg	6.12	0.07	0.01	low
1057	DEF0A	LK Plön	3.88	0.07	0.01	low
1058	DEF0B	LK Rendsburg-Eckernförde	2.94	0.07	0.01	low
1059	DEF0C	LK Schleswig-Flensburg	0.5	0.07	0	low
1060	DEF0D	LK Segeberg	4.04	0.07	0.01	low
1061	DEF0E	LK Steinburg	3.79	0.07	0.01	low
1062	DEF0F	LK Stormarn	5.38	0.07	0.01	low
2000	DE600	SK Hamburg	12.93	0.07	0.02	low
3101	DE911	SK Braunschweig	3.62	0.07	0.01	low
3102	DE912	SK Salzgitter	1.93	0.07	0	low
3103	DE913	SK Wolfsburg	3.23	0.08	0.01	low
3151	DE914	LK Gifhorn	4.58	0.07	0.01	low
3153	DE916	LK Goslar	0.72	0.08	0	low
3154	DE917	LK Helmstedt	1.09	0.07	0	low
3155	DE918	LK Northeim	2.99	0.08	0.01	low
3157	DE91A	LK Peine	5.26	0.07	0.01	low
3158	DE91B	LK Wolfenbüttel	2.48	0.07	0	low
3159	-----	LK Göttingen	4.28	0.08	0.01	low
3241	DE929	Region Hannover	4.79	0.08	0.01	low
3251	DE922	LK Diepholz	0.93	0.09	0	low
3252	DE923	LK Hameln-Pyrmont	2.02	0.09	0.01	low
3254	DE925	LK Hildesheim	1.8	0.08	0	low
3255	DE926	LK Holzminden	0	0.09	0	low
3256	DE927	LK Nienburg (Weser)	1.65	0.08	0	low
3257	DE928	LK Schaumburg	1.27	0.09	0	low
3351	DE931	LK Celle	2.24	0.07	0	low
3352	DE932	LK Cuxhaven	0.5	0.07	0	low
3353	DE933	LK Harburg	3.2	0.07	0	low
3354	DE934	LK Lüchow-Dannenberg	0	0.08	0	low
3355	DE935	LK Lüneburg	3.3	0.07	0.01	low
3356	DE936	LK Osterholz	0.89	0.08	0	low
3357	DE937	LK Rotenburg (Wümme)	2.45	0.07	0	low
3358	DE938	LK Heidekreis	0.72	0.07	0	low
3359	DE939	LK Stade	2.98	0.07	0	low
3360	DE93A	LK Uelzen	5.38	0.07	0.01	low
3361	DE93B	LK Verden	1.47	0.07	0	low
3401	DE941	SK Delmenhorst	2.6	0.08	0.01	low
3402	DE942	SK Emden	5.94	0.08	0.01	low
3403	DE943	SK Oldenburg	3.62	0.08	0.01	low
3404	DE944	SK Osnabrück	7.92	0.11	0.03	low
3405	DE945	SK Wilhelmshaven	2.62	0.08	0.01	low
3451	DE946	LK Ammerland	0	0.08	0	low
3452	DE947	LK Aurich	2.1	0.08	0	low
3453	DE948	LK Cloppenburg	2.41	0.09	0.01	low
3454	DE949	LK Emsland	1.24	0.09	0	low
3455	DE94A	LK Friesland	1.02	0.08	0	low
3456	DE94B	LK Grafschaft Bentheim	1.47	0.09	0	low
3457	DE94C	LK Leer	0.59	0.08	0	low
3458	DE94D	LK Oldenburg	1.54	0.08	0	low
3459	DE94E	LK Osnabrück	3.38	0.11	0.01	low
3460	DE94F	LK Vechta	0	0.1	0	low
3461	DE94G	LK Wesermarsch	2.24	0.08	0	low
3462	DE94H	LK Wittmund	1.76	0.08	0	low
4011	DE501	SK Bremen	5.66	0.08	0.01	low
4012	DE502	SK Bremerhaven	1.77	0.08	0	low
5111	DEA11	SK Düsseldorf	9.46	0.41	0.24	elevated
5112	DEA12	SK Duisburg	1.2	0.42	0.03	low
5113	DEA13	SK Essen	3.26	0.37	0.07	low
5114	DEA14	SK Krefeld	4.41	0.41	0.11	elevated
5116	DEA15	SK Mönchengladbach	4.6	0.4	0.11	elevated
5117	DEA16	SK Mülheim a.d.Ruhr	2.34	0.4	0.06	low
5119	DEA17	SK Oberhausen	3.31	0.39	0.08	low
5120	DEA18	SK Remscheid	3.62	0.12	0.02	low
5122	DEA19	SK Solingen	1.89	0.22	0.02	low
5124	DEA1A	SK Wuppertal	2.55	0.11	0.01	low
5154	DEA1B	LK Kleve	1.93	0.21	0.02	low
5158	DEA1C	LK Mettmann	5.57	0.31	0.1	low
5162	DEA1D	LK Rhein-Kreis Neuss	4.25	0.41	0.11	elevated
5166	DEA1E	LK Viersen	2.35	0.35	0.05	low
5170	DEA1F	LK Wesel	2.82	0.31	0.05	low
5314	DEA22	SK Bonn	11.49	0.2	0.12	elevated
5315	DEA23	SK Köln	13.85	0.33	0.27	elevated
5316	DEA24	SK Leverkusen	4.9	0.35	0.1	elevated
5334	DEA2D	StadtRegion Aachen	6.7	0.16	0.05	low
5358	DEA26	LK Düren	1.53	0.28	0.02	low
5362	DEA27	LK Rhein-Erft-Kreis	5.8	0.35	0.12	elevated
5366	DEA28	LK Euskirchen	2.09	0.11	0.01	low
5370	DEA29	LK Heinsberg	1.98	0.34	0.04	low
5374	DEA2A	LK Oberbergischer Kreis	3.66	0.11	0.01	low
5378	DEA2B	LK Rheinisch-Bergischer Kreis	8.82	0.18	0.08	low
5382	DEA2C	LK Rhein-Sieg-Kreis	3.85	0.17	0.03	low
5512	DEA31	SK Bottrop	5.11	0.37	0.11	elevated
5513	DEA32	SK Gelsenkirchen	1.14	0.36	0.02	low
5515	DEA33	SK Münster	9.62	0.1	0.04	low
5554	DEA34	LK Borken	2.43	0.12	0.01	low
5558	DEA35	LK Coesfeld	3.2	0.11	0.01	low
5562	DEA36	LK Recklinghausen	1.78	0.25	0.03	low
5566	DEA37	LK Steinfurt	3.15	0.1	0.01	low
5570	DEA38	LK Warendorf	3.24	0.11	0.01	low
5711	DEA41	SK Bielefeld	5.7	0.11	0.02	low
5754	DEA42	LK Gütersloh	3.32	0.11	0.01	low
5758	DEA43	LK Herford	1.99	0.11	0.01	low
5762	DEA44	LK Höxter	1.4	0.1	0.01	low
5766	DEA45	LK Lippe	4.59	0.11	0.02	low
5770	DEA46	LK Minden-Lübbecke	2.57	0.1	0.01	low
5774	DEA47	LK Paderborn	3.28	0.11	0.01	low
5911	DEA51	SK Bochum	6.58	0.25	0.09	low
5913	DEA52	SK Dortmund	3.24	0.15	0.02	low
5914	DEA53	SK Hagen	2.12	0.11	0.01	low
5915	DEA54	SK Hamm	0.56	0.13	0	low
5916	DEA55	SK Herne	0.64	0.34	0.01	low
5954	DEA56	LK Ennepe-Ruhr-Kreis	5.84	0.14	0.04	low
5958	DEA57	LK Hochsauerlandkreis	2.67	0.09	0.01	low
5962	DEA58	LK Märkischer Kreis	3.14	0.1	0.01	low
5966	DEA59	LK Olpe	2.96	0.09	0.01	low
5970	DEA5A	LK Siegen-Wittgenstein	1.44	0.09	0	low
5974	DEA5B	LK Soest	2.65	0.11	0.01	low
5978	DEA5C	LK Unna	3.53	0.12	0.02	low
6411	DE711	SK Darmstadt	9.53	0.22	0.11	elevated
6412	DE712	SK Frankfurt am Main	15.48	0.26	0.23	elevated
6413	DE713	SK Offenbach	2.41	0.29	0.04	low
6414	DE714	SK Wiesbaden	9.73	0.11	0.04	low
6431	DE715	LK Bergstraße	7.84	0.24	0.1	elevated
6432	DE716	LK Darmstadt-Dieburg	8.48	0.21	0.09	low
6433	DE717	LK Groß-Gerau	8.18	0.2	0.09	low
6434	DE718	LK Hochtaunuskreis	9.36	0.1	0.04	low
6435	DE719	LK Main-Kinzig-Kreis	6	0.13	0.04	low
6436	DE71A	LK Main-Taunus-Kreis	8.06	0.13	0.05	low
6437	DE71B	LK Odenwaldkreis	6.22	0.18	0.06	low
6438	DE71C	LK Offenbach	7.71	0.25	0.11	elevated
6439	DE71D	LK Rheingau-Taunus-Kreis	6.46	0.08	0.01	low
6440	DE71E	LK Wetteraukreis	6.91	0.16	0.05	low
6531	DE721	LK Gießen	6.4	0.15	0.04	low
6532	DE722	LK Lahn-Dill-Kreis	2.36	0.11	0.01	low
6533	DE723	LK Limburg-Weilburg	5.23	0.1	0.02	low
6534	DE724	LK Marburg-Biedenkopf	6.12	0.11	0.03	low
6535	DE725	LK Vogelsbergkreis	6.56	0.08	0.02	low
6611	DE731	SK Kassel	3.52	0.12	0.02	low
6631	DE732	LK Fulda	5.43	0.06	0.01	low
6632	DE733	LK Hersfeld-Rotenburg	2.48	0.07	0	low
6633	DE734	LK Kassel	0.84	0.09	0	low
6634	DE735	LK Schwalm-Eder-Kreis	3.31	0.08	0.01	low
6635	DE736	LK Waldeck-Frankenberg	1.27	0.1	0	low
6636	DE737	LK Werra-Meißner-Kreis	5.94	0.08	0.01	low
7111	DEB11	SK Koblenz	5.28	0.15	0.04	low
7131	DEB12	LK Ahrweiler	0.78	0.1	0	low
7132	DEB13	LK Altenkirchen	3.88	0.11	0.02	low
7133	DEB14	LK Bad Kreuznach	6.35	0.08	0.01	low
7134	DEB15	LK Birkenfeld	6.19	0.09	0.02	low
7135	DEB16	LK Cochem-Zell	4.85	0.08	0.01	low
7137	DEB17	LK Mayen-Koblenz	2.82	0.11	0.01	low
7138	DEB18	LK Neuwied	4.41	0.11	0.02	low
7140	DEB19	LK Rhein-Hunsrück-Kreis	0.97	0.08	0	low
7141	DEB1A	LK Rhein-Lahn-Kreis	2.45	0.09	0.01	low
7143	DEB1B	LK Westerwaldkreis	1.99	0.09	0.01	low
7211	DEB21	SK Trier	6.36	0.16	0.05	low
7231	DEB22	LK Bernkastel-Wittlich	2.68	0.08	0.01	low
7232	DEB23	LK Bitburg-Prüm	1.02	0.09	0	low
7233	DEB24	LK Vulkaneifel	0	0.09	0	low
7235	DEB25	LK Trier-Saarburg	0.68	0.12	0	low
7311	DEB31	SK Frankenthal	2.06	0.29	0.03	low
7312	DEB32	SK Kaiserslautern	1.01	0.08	0	low
7313	DEB33	SK Landau i.d.Pfalz	8.69	0.2	0.09	low
7314	DEB34	SK Ludwigshafen	10.8	0.35	0.22	elevated
7315	DEB35	SK Mainz	8.9	0.13	0.05	low
7316	DEB36	SK Neustadt a.d.Weinstraße	1.88	0.22	0.02	low
7317	DEB37	SK Pirmasens	0	0.09	0	low
7318	DEB38	SK Speyer	11.87	0.46	0.34	high
7319	DEB39	SK Worms	4.84	0.21	0.05	low
7320	DEB3A	SK Zweibrücken	2.9	0.09	0.01	low
7331	DEB3B	LK Alzey-Worms	10.14	0.12	0.05	low
7332	DEB3C	LK Bad Dürkheim	12.03	0.15	0.09	low
7333	DEB3D	LK Donnersbergkreis	6.65	0.08	0.01	low
7334	DEB3E	LK Germersheim	7.8	0.47	0.22	elevated
7335	DEB3F	LK Kaiserslautern	2.84	0.08	0.01	low
7336	DEB3G	LK Kusel	2.82	0.08	0.01	low
7337	DEB3H	LK Südliche Weinstraße	9.02	0.22	0.11	elevated
7338	DEB3I	LK Rhein-Pfalz-Kreis	10.45	0.38	0.24	elevated
7339	DEB3J	LK Mainz-Bingen	8.13	0.11	0.04	low
7340	DEB3K	LK Südwestpfalz	7.29	0.1	0.02	low
8111	DE111	SK Stuttgart	8.44	0.11	0.04	low
8115	DE112	LK Böblingen	4.41	0.12	0.02	low
8116	DE113	LK Esslingen	7.38	0.09	0.02	low
8117	DE114	LK Göppingen	5.5	0.07	0.01	low
8118	DE115	LK Ludwigsburg	3.72	0.17	0.03	low
8119	DE116	LK Rems-Murr-Kreis	8.52	0.1	0.03	low
8121	DE117	SK Heilbronn	4.85	0.31	0.09	low
8125	DE118	LK Heilbronn	5.04	0.25	0.07	low
8126	DE119	LK Hohenlohekreis	7.23	0.14	0.04	low
8127	DE11A	LK Schwäbisch Hall	5.18	0.09	0.01	low
8128	DE11B	LK Main-Tauber-Kreis	3.78	0.12	0.02	low
8135	DE11C	LK Heidenheim	7.6	0.06	0.01	low
8136	DE11D	LK Ostalbkreis	4.81	0.07	0.01	low
8211	DE121	SK Baden-Baden	7.37	0.37	0.16	elevated
8212	DE122	SK Karlsruhe	14.19	0.55	0.49	high
8215	DE123	LK Karlsruhe	10.67	0.44	0.29	elevated
8216	DE124	LK Rastatt	6.55	0.36	0.14	elevated
8221	DE125	SK Heidelberg	15.01	0.28	0.24	elevated
8222	DE126	SK Mannheim	12.8	0.37	0.28	elevated
8225	DE127	LK Neckar-Odenwald-Kreis	4.89	0.19	0.05	low
8226	DE128	LK Rhein-Neckar-Kreis	11.94	0.33	0.23	elevated
8231	DE129	SK Pforzheim	5.67	0.28	0.09	low
8235	DE12A	LK Calw	5.13	0.14	0.03	low
8236	DE12B	LK Enzkreis	4.06	0.26	0.06	low
8237	DE12C	LK Freudenstadt	5.14	0.1	0.02	low
8311	DE131	SK Freiburg i.Breisgau	22.41	0.57	0.81	high
8315	DE132	LK Breisgau-Hochschwarzwald	11.14	0.19	0.11	elevated
8316	DE133	LK Emmendingen	11.64	0.39	0.28	elevated
8317	DE134	LK Ortenaukreis	8.27	0.35	0.17	elevated
8325	DE135	LK Rottweil	6.51	0.11	0.03	low
8326	DE136	LK Schwarzwald-Baar-Kreis	8.09	0.06	0.01	low
8327	DE137	LK Tuttlingen	4.34	0.09	0.01	low
8335	DE138	LK Konstanz	8.5	0.25	0.12	elevated
8336	DE139	LK Lörrach	8.35	0.21	0.09	low
8337	DE13A	LK Waldshut	5.33	0.14	0.03	low
8415	DE141	LK Reutlingen	4.93	0.08	0.01	low
8416	DE142	LK Tübingen	3.56	0.13	0.02	low
8417	DE143	LK Zollernalbkreis	2.13	0.11	0.01	low
8421	DE144	SK Ulm	17.75	0.06	0.01	low
8425	DE145	LK Alb-Donau-Kreis	4.66	0.06	0.01	low
8426	DE146	LK Biberach	8.66	0.08	0.02	low
8435	DE147	LK Bodenseekreis	11.26	0.25	0.15	elevated
8436	DE148	LK Ravensburg	11.36	0.1	0.04	low
8437	DE149	LK Sigmaringen	6.14	0.12	0.03	low
9161	DE211	SK Ingolstadt	14.22	0.07	0.02	low
9162	DE212	SK München	27.66	0.06	0.03	low
9163	DE213	SK Rosenheim	7.98	0.09	0.02	low
9171	DE214	LK Altötting	13.71	0.11	0.06	low
9172	DE215	LK Berchtesgadener Land	3.83	0.09	0.01	low
9173	DE216	LK Bad Tölz-Wolfratshausen	12.73	0.06	0.01	low
9174	DE217	LK Dachau	15.25	0.07	0.02	low
9175	DE218	LK Ebersberg	15.11	0.06	0.02	low
9176	DE219	LK Eichstätt	9.94	0.05	0.01	low
9177	DE21A	LK Erding	9.6	0.06	0.01	low
9178	DE21B	LK Freising	9.67	0.05	0	low
9179	DE21C	LK Fürstenfeldbruck	11.99	0.08	0.03	low
9180	DE21D	LK Garmisch-Partenkirchen	6.83	0.06	0.01	low
9181	DE21E	LK Landsberg a.Lech	5.9	0.08	0.01	low
9182	DE21F	LK Miesbach	9.11	0.06	0.01	low
9183	DE21G	LK Mühldorf a.Inn	2.65	0.08	0.01	low
9184	DE21H	LK München	16.6	0.06	0.02	low
9185	DE21I	LK Neuburg-Schrobenhausen	4.18	0.07	0.01	low
9186	DE21J	LK Pfaffenhofen a.d.Ilm	6.4	0.06	0	low
9187	DE21K	LK Rosenheim	12.43	0.08	0.03	low
9188	DE21L	LK Starnberg	4.45	0.08	0.01	low
9189	DE21M	LK Traunstein	6.27	0.09	0.02	low
9190	DE21N	LK Weilheim-Schongau	8.22	0.08	0.02	low
9261	DE221	SK Landshut	15.71	0.05	0.01	low
9262	DE222	SK Passau	9.79	0.15	0.07	low
9263	DE223	SK Straubing	2.12	0.05	0	low
9271	DE224	LK Deggendorf	6.8	0.09	0.02	low
9272	DE225	LK Freyung-Grafenau	3.84	0.06	0	low
9273	DE226	LK Kelheim	4.17	0.05	0	low
9274	DE227	LK Landshut	8.36	0.06	0.01	low
9275	DE228	LK Passau	3.71	0.13	0.02	low
9276	DE229	LK Regen	5.18	0.06	0	low
9277	DE22A	LK Rottal-Inn	5.85	0.11	0.02	low
9278	DE22B	LK Straubing-Bogen	2.02	0.05	0	low
9279	DE22C	LK Dingolfing-Landau	7.37	0.08	0.02	low
9361	DE231	SK Amberg	2.36	0.05	0	low
9362	DE232	SK Regensburg	14.8	0.05	0.01	low
9363	DE233	SK Weiden i.d.OPf.	7.06	0.05	0	low
9371	DE234	LK Amberg-Sulzbach	5.82	0.05	0	low
9372	DE235	LK Cham	4.73	0.05	0	low
9373	DE236	LK Neumarkt i.d.OPf.	3.8	0.05	0	low
9374	DE237	LK Neustadt a.d.Waldnaab	2.12	0.05	0	low
9375	DE238	LK Regensburg	9.97	0.05	0	low
9376	DE239	LK Schwandorf	6.88	0.05	0	low
9377	DE23A	LK Tirschenreuth	1.37	0.05	0	low
9461	DE241	SK Bamberg	2.64	0.07	0	low
9462	DE242	SK Bayreuth	6.84	0.08	0.01	low
9463	DE243	SK Coburg	2.43	0.05	0	low
9464	DE244	SK Hof	2.21	0.05	0	low
9471	DE245	LK Bamberg	3.42	0.07	0	low
9472	DE246	LK Bayreuth	7.7	0.06	0.01	low
9473	DE247	LK Coburg	4.61	0.05	0	low
9474	DE248	LK Forchheim	4.34	0.08	0.01	low
9475	DE249	LK Hof	3.13	0.05	0	low
9476	DE24A	LK Kronach	4.44	0.06	0	low
9477	DE24B	LK Kulmbach	2.78	0.07	0	low
9478	DE24C	LK Lichtenfels	7.5	0.06	0	low
9479	DE24D	LK Wunsiedel i.Fichtelgebirge	1.37	0.05	0	low
9561	DE251	SK Ansbach	4.82	0.06	0	low
9562	DE252	SK Erlangen	14.51	0.1	0.05	low
9563	DE253	SK Fürth	10.37	0.1	0.04	low
9564	DE254	SK Nürnberg	8.4	0.1	0.03	low
9565	DE255	SK Schwabach	4.91	0.1	0.02	low
9571	DE256	LK Ansbach	7.14	0.06	0.01	low
9572	DE257	LK Erlangen-Höchstadt	7.43	0.1	0.03	low
9573	DE258	LK Fürth	9.49	0.1	0.03	low
9574	DE259	LK Nürnberger Land	3.55	0.07	0.01	low
9575	DE25A	LK Neustadt a.d.Aisch-Bad Windsheim	7.05	0.09	0.02	low
9576	DE25B	LK Roth	0.8	0.07	0	low
9577	DE25C	LK Weißenburg-Gunzenhausen	5.32	0.06	0	low
9661	DE261	SK Aschaffenburg	7.23	0.2	0.08	low
9662	DE262	SK Schweinfurt	3.79	0.09	0.01	low
9663	DE263	SK Würzburg	13.49	0.1	0.05	low
9671	DE264	LK Aschaffenburg	9.22	0.16	0.07	low
9672	DE265	LK Bad Kissingen	4.85	0.07	0.01	low
9673	DE266	LK Rhön-Grabfeld	8.77	0.06	0.01	low
9674	DE267	LK Haßberge	4.74	0.06	0.01	low
9675	DE268	LK Kitzingen	8.91	0.09	0.03	low
9676	DE269	LK Miltenberg	5.45	0.17	0.05	low
9677	DE26A	LK Main-Spessart	7.13	0.11	0.03	low
9678	DE26B	LK Schweinfurt	3.48	0.08	0.01	low
9679	DE26C	LK Würzburg	11.8	0.1	0.04	low
9761	DE271	SK Augsburg	9.67	0.08	0.02	low
9762	DE272	SK Kaufbeuren	4.64	0.06	0	low
9763	DE273	SK Kempten	7.4	0.06	0.01	low
9764	DE274	SK Memmingen	2.31	0.07	0	low
9771	DE275	LK Aichach-Friedberg	6.85	0.07	0.01	low
9772	DE276	LK Augsburg	5.25	0.07	0.01	low
9773	DE277	LK Dillingen a.d.Donau	3.17	0.08	0.01	low
9774	DE278	LK Günzburg	6.48	0.07	0.01	low
9775	DE279	LK Neu-Ulm	11.11	0.06	0.01	low
9776	DE27A	LK Lindau	17.29	0.11	0.08	low
9777	DE27B	LK Ostallgäu	13.02	0.06	0.01	low
9778	DE27C	LK Unterallgäu	2.13	0.07	0	low
9779	DE27D	LK Donau-Ries	6.05	0.06	0.01	low
9780	DE27E	LK Oberallgäu	8.45	0.06	0.01	low
10041	DEC01	LK Stadtverband Saarbrücken	2.73	0.25	0.04	low
10042	DEC02	LK Merzig-Wadern	1.92	0.19	0.02	low
10043	DEC03	LK Neunkirchen	2.99	0.11	0.01	low
10044	DEC04	LK Saarlouis	2.54	0.29	0.04	low
10045	DEC05	LK Saar-Pfalz-Kreis	2.08	0.13	0.01	low
10046	DEC06	LK Sankt Wendel	5.65	0.1	0.02	low
11000	DE300	SK Berlin	14.29	0.08	0.04	low
12051	DE401	SK Brandenburg a.d.Havel	4.19	0.08	0.01	low
12052	DE402	SK Cottbus	1	0.08	0	low
12053	DE403	SK Frankfurt (Oder)	1.72	0.05	0	low
12054	DE404	SK Potsdam	9.31	0.09	0.03	low
12060	DE405	LK Barnim	3.9	0.08	0.01	low
12061	DE406	LK Dahme-Spreewald	4.82	0.08	0.01	low
12062	DE407	LK Elbe-Elster	1.92	0.08	0	low
12063	DE408	LK Havelland	5.64	0.08	0.01	low
12064	DE409	LK Märkisch-Oderland	2.09	0.06	0	low
12065	DE40A	LK Oberhavel	4.31	0.08	0.01	low
12066	DE40B	LK Oberspreewald-Lausitz	1.79	0.08	0	low
12067	DE40C	LK Oder-Spree	2.8	0.07	0	low
12068	DE40D	LK Ostprignitz-Ruppin	3.02	0.07	0.01	low
12069	DE40E	LK Potsdam-Mittelmark	3.77	0.09	0.01	low
12070	DE40F	LK Prignitz	0	0.07	0	low
12071	DE40G	LK Spree-Neiße	5.14	0.07	0.01	low
12072	DE40H	LK Teltow-Fläming	4.25	0.09	0.01	low
12073	DE40I	LK Uckermark	3.31	0.07	0.01	low
13003	DE803	SK Rostock	5.78	0.06	0.01	low
13004	DE804	SK Schwerin	6.27	0.07	0.01	low
13071	DE80J	LK Mecklenburgische Seenplatte	3.06	0.06	0	low
13072	DE80K	LK Rostock	2.8	0.06	0	low
13073	DE80L	LK Vorpommern–Rügen	2.22	0.06	0	low
13074	DE80M	LK Nordwestmecklenburg	1.91	0.07	0	low
13075	DE80N	LK Vorpommern–Greifswald	3.79	0.07	0.01	low
13076	DE80O	LK Ludwigslust–Parchim	1.41	0.07	0	low
14511	DED41	SK Chemnitz	3.25	0.05	0	low
14521	DED42	LK Erzgebirgskreis	2.32	0.05	0	low
14522	DED43	LK Mittelsachsen	0.64	0.06	0	low
14523	DED44	LK Vogtlandkreis	6.06	0.05	0	low
14524	DED45	LK Zwickau	3.42	0.06	0	low
14612	DED21	SK Dresden	6.58	0.07	0.01	low
14625	DED2C	LK Bautzen	2.95	0.07	0	low
14626	DED2D	LK Görlitz	0.77	0.06	0	low
14627	DED2E	LK Meißen	1.23	0.08	0	low
14628	DED2F	LK Sächsische Schweiz-Osterzgebirge	0.81	0.05	0	low
14713	DED51	SK Leipzig	8.05	0.08	0.02	low
14729	DED52	LK Leipzig	2.71	0.08	0.01	low
14730	DED53	LK Nordsachsen	2.52	0.08	0.01	low
15001	DEE01	SK Dessau-Roßlau	2.42	0.08	0.01	low
15002	DEE02	SK Halle	3.36	0.08	0.01	low
15003	DEE03	SK Magdeburg	4.62	0.09	0.01	low
15081	DEE04	LK Altmarkkreis Salzwedel	0	0.09	0	low
15082	DEE05	LK Anhalt-Bitterfeld	1.23	0.08	0	low
15083	DEE07	LK Börde	0.58	0.08	0	low
15084	DEE08	LK Burgenlandkreis	2.73	0.07	0	low
15085	DEE09	LK Harz	1.37	0.07	0	low
15086	DEE06	LK Jerichower Land	0	0.08	0	low
15087	DEE0A	LK Mansfeld-Südharz	2.15	0.07	0	low
15088	DEE0B	LK Saalekreis	2.69	0.08	0.01	low
15089	DEE0C	LK Salzlandkreis	2.57	0.08	0.01	low
15090	DEE0D	LK Stendal	2.62	0.09	0.01	low
15091	DEE0E	LK Wittenberg	3.92	0.08	0.01	low
16051	DEG01	SK Erfurt	2.37	0.06	0	low
16052	DEG02	SK Gera	4.22	0.06	0	low
16053	DEG03	SK Jena	6.35	0.07	0.01	low
16054	DEG04	SK Suhl	5.62	0.05	0	low
16055	DEG05	SK Weimar	4.66	0.06	0	low
16056	DEG0N	SK Eisenach	0	0.07	0	low
16061	DEG06	LK Eichsfeld	0.99	0.08	0	low
16062	DEG07	LK Nordhausen	1.18	0.07	0	low
16063	DEG0P	LK Wartburgkreis	4.81	0.06	0.01	low
16064	DEG09	LK Unstrut-Hainich-Kreis	3.85	0.07	0.01	low
16065	DEG0A	LK Kyffhäuserkreis	7.82	0.07	0.01	low
16066	DEG0B	LK Schmalkalden-Meiningen	2.43	0.06	0	low
16067	DEG0C	LK Gotha	3.69	0.06	0	low
16068	DEG0D	LK Sömmerda	4.28	0.07	0.01	low
16069	DEG0E	LK Hildburghausen	3.11	0.05	0	low
16070	DEG0F	LK Ilm-Kreis	5.5	0.05	0	low
16071	DEG0G	LK Weimarer Land	2.43	0.06	0	low
16072	DEG0H	LK Sonneberg	5.31	0.05	0	low
16073	DEG0I	LK Saalfeld-Rudolstadt	4.62	0.06	0	low
16074	DEG0J	LK Saale-Holzland-Kreis	4.73	0.06	0.01	low
16075	DEG0K	LK Saale-Orla-Kreis	4.86	0.06	0	low
16076	DEG0L	LK Greiz	2.01	0.06	0	low
16077	DEG0M	LK Altenburger Land	5.46	0.07	0.01	low

## Sheet: Legend
Kreiskennziffer
NUTS
name
incidencerate
climatic suitability
relative risk
relative risk class
